# Supplementary material for: Mechanism of the Impact-Sensitivity Reduction of Energetic CL-20/TNT Cocrystals: A Nonequilibrium Molecular Dynamics Study
Source: MDPI journal article supplement (doi:10.3390/polym15061576), 2023-03-22
Supplement: s1 [file s1]

# Mechanism of the impact-sensitivity reduction of energetic CL-20/TNT cocrystals: a nonequilibrium molecular dynamics study

Fuping Wang<sup>1,\*</sup>, Guangyan Du<sup>1</sup>, Chenggen Zhang<sup>1</sup> and Qian-You Wang<sup>2</sup>

<sup>1</sup> Department of Chemistry and Material Science, Langfang Normal University, Langfang, 065000, China

<sup>2</sup> Henan Key Laboratory of Crystalline Molecular Functional Materials, Green Catalysis Center and College of Chemistry, Zhengzhou University, Zhengzhou 450001, China

\* Correspondence: wangfuping@lfnu.edu.cn

## Supplementary Materials:

Figure S1: Change of pressure, density and temperature of CL-20 and TNT with time under different impact velocities; Table S1: Elementary reactions of CL-20/TNT decomposition at different impact velocities. Table S2: Elementary reactions of CL-20 decomposition at different impact velocities. Table S3: Elementary reactions of TNT decomposition at different impact velocities.

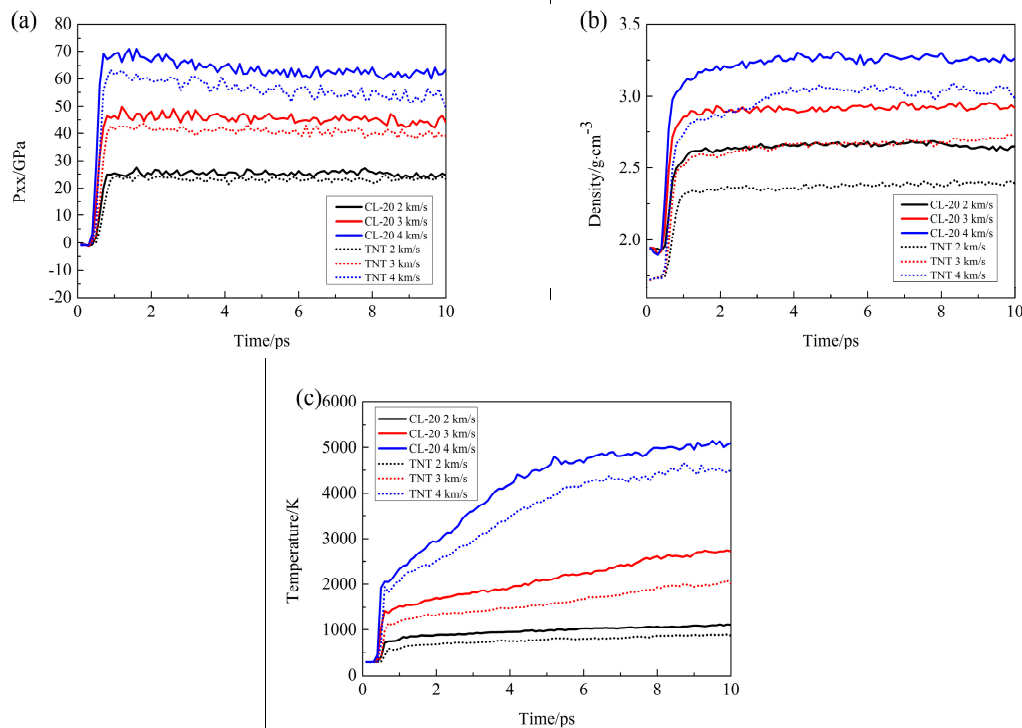

**Figure S1.** Change of pressure, density and temperature of CL-20 and TNT with time under different impact velocities.

**Table S1.** Elementary reactions of CL-20/TNT cocrystal decomposition at different impact velocities.

| Impact velocities /km/s | Frequencies | Reaction time/ps | Elementary reactions                                                                                                                                                                                                            | Illustration |
|-------------------------|-------------|------------------|---------------------------------------------------------------------------------------------------------------------------------------------------------------------------------------------------------------------------------|--------------|
| 2                       | 4           | 1.0-6.0          | $\text{C}_6\text{H}_6\text{N}_{12}\text{O}_{12} + \text{C}_7\text{H}_5\text{N}_3\text{O}_6 \rightarrow \text{C}_{13}\text{H}_{11}\text{N}_{15}\text{O}_{18}$                                                                    | First occur  |
|                         | 2           | 1.9-7.1          | $\text{C}_{13}\text{H}_{11}\text{N}_{15}\text{O}_{18} + \text{C}_6\text{H}_6\text{N}_{12}\text{O}_{12} \rightarrow \text{C}_{19}\text{H}_{17}\text{N}_{27}\text{O}_{30}$                                                        |              |
|                         | 1           | 2.0-2.0          | $\text{C}_{19}\text{H}_{17}\text{N}_{27}\text{O}_{30} \rightarrow \text{C}_{13}\text{H}_{11}\text{N}_{15}\text{O}_{18} + \text{C}_6\text{H}_6\text{N}_{12}\text{O}_{12}$                                                        |              |
|                         | 2           | 2.7-5.9          | $\text{C}_7\text{H}_5\text{N}_3\text{O}_6 \rightarrow \text{C}_7\text{H}_5\text{N}_3\text{O}_6\text{-X}(\text{C}_6\text{H}_6\text{N}_{12}\text{O}_{12})$                                                                        |              |
|                         | 1           | 3.0-3.0          | $\text{C}_7\text{H}_5\text{N}_3\text{O}_6\text{-X}(\text{C}_6\text{H}_6\text{N}_{12}\text{O}_{12}) \rightarrow \text{NO}_2 + \text{C}_7\text{H}_5\text{N}_2\text{O}_4\text{-X}(\text{C}_6\text{H}_6\text{N}_{12}\text{O}_{12})$ |              |

|   |    |         |                                                                                                                                                                                                                                                                                                                                                            |                   |
|---|----|---------|------------------------------------------------------------------------------------------------------------------------------------------------------------------------------------------------------------------------------------------------------------------------------------------------------------------------------------------------------------|-------------------|
| 3 | 1  | 3.1-3.1 | $\text{NO}_2 + \text{C}_7\text{H}_5\text{N}_2\text{O}_4 \rightarrow \text{X}(\text{C}_6\text{H}_6\text{N}_{12}\text{O}_{12}) \rightarrow \text{C}_7\text{H}_5\text{N}_3\text{O}_6 \rightarrow \text{X}(\text{C}_6\text{H}_6\text{N}_{12}\text{O}_{12})$                                                                                                    | Highest frequency |
|   | 4  | 1.0-6.0 | $\text{C}_6\text{H}_6\text{N}_{12}\text{O}_{12} + \text{C}_7\text{H}_5\text{N}_3\text{O}_6 \rightarrow \text{C}_{13}\text{H}_{11}\text{N}_{15}\text{O}_{18}$                                                                                                                                                                                               |                   |
|   | 3  | 3.8-5.9 | $\text{C}_6\text{H}_6\text{N}_{12}\text{O}_{12} \rightarrow \text{C}_6\text{H}_6\text{N}_{12}\text{O}_{12} \rightarrow \text{X}(\text{C}_6\text{H}_6\text{N}_{12}\text{O}_{12})$                                                                                                                                                                           |                   |
|   | 3  | 3.9-6.0 | $\text{C}_6\text{H}_6\text{N}_{12}\text{O}_{12} \rightarrow \text{X}(\text{C}_6\text{H}_6\text{N}_{12}\text{O}_{12}) \rightarrow \text{C}_6\text{H}_6\text{N}_{12}\text{O}_{12}$                                                                                                                                                                           |                   |
|   | 3  | 7.9-9.8 | $\text{C}_7\text{H}_5\text{N}_5\text{O}_8 \rightarrow \text{N}_2 + \text{C}_7\text{H}_5\text{N}_3\text{O}_8$                                                                                                                                                                                                                                               |                   |
|   | 3  | 7.8-8.7 | $\text{N}_2 + \text{C}_7\text{H}_5\text{N}_3\text{O}_8 \rightarrow \text{C}_7\text{H}_5\text{N}_5\text{O}_8$                                                                                                                                                                                                                                               | First occur       |
|   | 2  | 0.5-0.8 | $\text{C}_6\text{H}_6\text{N}_{12}\text{O}_{12} \rightarrow \text{C}_6\text{H}_6\text{N}_{12}\text{O}_{12} \rightarrow \text{X}(\text{C}_6\text{H}_6\text{N}_{12}\text{O}_{12})$                                                                                                                                                                           |                   |
|   | 1  | 0.6-0.6 | $\text{C}_6\text{H}_6\text{N}_{12}\text{O}_{12} \rightarrow \text{X}(\text{C}_6\text{H}_6\text{N}_{12}\text{O}_{12}) \rightarrow \text{C}_6\text{H}_6\text{N}_{12}\text{O}_{12}$                                                                                                                                                                           |                   |
|   | 1  | 0.6-0.6 | $\text{C}_6\text{H}_6\text{N}_{12}\text{O}_{12} + \text{C}_6\text{H}_6\text{N}_{12}\text{O}_{12} + \text{C}_6\text{H}_6\text{N}_{12}\text{O}_{12} + \text{C}_6\text{H}_6\text{N}_{12}\text{O}_{12} + \text{C}_7\text{H}_5\text{N}_3\text{O}_6 + \text{C}_7\text{H}_5\text{N}_3\text{O}_6 \rightarrow \text{C}_{38}\text{H}_{34}\text{N}_{54}\text{O}_{60}$ |                   |
|   | 1  | 0.7-0.7 | $\text{C}_7\text{H}_5\text{N}_3\text{O}_6 \rightarrow \text{C}_7\text{H}_5\text{N}_3\text{O}_6 \rightarrow \text{X}(\text{C}_6\text{H}_6\text{N}_{12}\text{O}_{12})$                                                                                                                                                                                       |                   |
|   | 1  | 0.7-0.7 | $\text{C}_{38}\text{H}_{34}\text{N}_{54}\text{O}_{60} \rightarrow \text{NO}_2 + \text{C}_{19}\text{H}_{17}\text{N}_{26}\text{O}_{28} + \text{C}_{19}\text{H}_{17}\text{N}_{27}\text{O}_{30}$                                                                                                                                                               |                   |
|   | 4  | 0.7-1.4 | $\text{C}_6\text{H}_6\text{N}_{12}\text{O}_{12} \rightarrow \text{C}_6\text{H}_6\text{N}_{12}\text{O}_{12} \rightarrow \text{X}(\text{C}_7\text{H}_5\text{N}_3\text{O}_6)$                                                                                                                                                                                 |                   |
|   | 2  | 0.8-0.8 | $\text{C}_6\text{H}_6\text{N}_{12}\text{O}_{12} \rightarrow \text{X}(\text{C}_7\text{H}_5\text{N}_3\text{O}_6) \rightarrow \text{C}_6\text{H}_6\text{N}_{12}\text{O}_{12}$                                                                                                                                                                                 |                   |
|   | 4  | 4.1-8.5 | $\text{NO}_2 \rightarrow \text{X}(\text{NO}_2) \rightarrow \text{NO}_2$                                                                                                                                                                                                                                                                                    | Highest frequency |
|   | 4  | 4.0-8.2 | $\text{NO}_2 \rightarrow \text{NO}_2 \rightarrow \text{X}(\text{NO}_2)$                                                                                                                                                                                                                                                                                    |                   |
|   | 3  | 2.8-7.3 | $\text{NO}_2 + \text{NO}_2 \rightarrow \text{N}_2\text{O}_4$                                                                                                                                                                                                                                                                                               |                   |
|   | 3  | 1.7-3.0 | $\text{C}_6\text{H}_6\text{N}_{12}\text{O}_{12} \rightarrow \text{NO}_2 + \text{C}_6\text{H}_6\text{N}_{11}\text{O}_{10}$                                                                                                                                                                                                                                  |                   |
|   | 2  | 7.5-7.0 | $\text{O} \rightarrow \text{X}(\text{N}_2\text{O}_3) + \text{N}_2 \rightarrow \text{N}_2\text{O} \rightarrow \text{X}(\text{N}_2\text{O}_3)$                                                                                                                                                                                                               |                   |
|   | 2  | 6.4-7.2 | $\text{NO}_2 \rightarrow \text{X}(\text{HO}) \rightarrow \text{NO}_2$                                                                                                                                                                                                                                                                                      |                   |
|   | 2  | 5.9-6.1 | $\text{C}_7\text{H}_5\text{N}_6\text{O}_{11} \rightarrow \text{N}_2 + \text{C}_7\text{H}_5\text{N}_4\text{O}_{11}$                                                                                                                                                                                                                                         |                   |
|   | 2  | 3.9-6.0 | $\text{N}_2\text{O}_4 \rightarrow \text{NO}_2 + \text{NO}_2$                                                                                                                                                                                                                                                                                               |                   |
|   | 2  | 3.6-4.2 | $\text{C}_{13}\text{H}_{11}\text{N}_{14}\text{O}_{17} \rightarrow \text{NO}_2 + \text{C}_{13}\text{H}_{11}\text{N}_{13}\text{O}_{15}$                                                                                                                                                                                                                      |                   |
|   | 2  | 2.3-2.9 | $\text{C}_7\text{H}_5\text{N}_4\text{O}_8 \rightarrow \text{NO}_2 + \text{C}_7\text{H}_5\text{N}_3\text{O}_6$                                                                                                                                                                                                                                              |                   |
|   | 2  | 2.2-2.7 | $\text{NO}_2 + \text{C}_7\text{H}_5\text{N}_3\text{O}_6 \rightarrow \text{C}_7\text{H}_5\text{N}_4\text{O}_8$                                                                                                                                                                                                                                              |                   |
|   | 2  | 2.0-2.3 | $\text{NO}_2 + \text{C}_6\text{H}_6\text{N}_{12}\text{O}_{12} \rightarrow \text{C}_6\text{H}_6\text{N}_{13}\text{O}_{14}$                                                                                                                                                                                                                                  |                   |
| 4 | 2  | 1.8-2.6 | $\text{C}_{13}\text{H}_{11}\text{N}_{14}\text{O}_{17} + \text{C}_6\text{H}_6\text{N}_{11}\text{O}_9 \rightarrow \text{C}_{19}\text{H}_{17}\text{N}_{25}\text{O}_{26}$                                                                                                                                                                                      | First occur       |
|   | 2  | 1.6-2.4 | $\text{C}_7\text{H}_5\text{N}_3\text{O}_6 \rightarrow \text{C}_7\text{H}_5\text{N}_3\text{O}_6 \rightarrow \text{X}(\text{NO}_2)$                                                                                                                                                                                                                          |                   |
|   | 2  | 1.3-1.5 | $\text{C}_{13}\text{H}_{11}\text{N}_{15}\text{O}_{18} \rightarrow \text{NO}_2 + \text{C}_{13}\text{H}_{11}\text{N}_{14}\text{O}_{16}$                                                                                                                                                                                                                      |                   |
|   | 2  | 0.5-0.5 | $\text{C}_6\text{H}_6\text{N}_{12}\text{O}_{12} + \text{C}_7\text{H}_5\text{N}_3\text{O}_6 \rightarrow \text{C}_{13}\text{H}_{11}\text{N}_{15}\text{O}_{18}$                                                                                                                                                                                               |                   |
|   | 2  | 0.5-0.5 | $\text{C}_6\text{H}_6\text{N}_{12}\text{O}_{12} \rightarrow \text{NO}_2 + \text{C}_6\text{H}_6\text{N}_{11}\text{O}_{10}$                                                                                                                                                                                                                                  |                   |
|   | 2  | 4.3-9.9 | $\text{N}_2 \rightarrow \text{N}_2 \rightarrow \text{X}(\text{H})$                                                                                                                                                                                                                                                                                         |                   |
|   | 2  | 5.2-9.6 | $\text{O} \rightarrow \text{X}(\text{H}_2) \rightarrow \text{O} \rightarrow \text{X}(\text{H})$                                                                                                                                                                                                                                                            | Highest frequency |
|   | 2  | 5.2-9.9 | $\text{HO} \rightarrow \text{X}(\text{H}) \rightarrow \text{HO}$                                                                                                                                                                                                                                                                                           |                   |
|   | 2  | 6.1-9.4 | $\text{N}_2 \rightarrow \text{X}(\text{H}) \rightarrow \text{N}_2$                                                                                                                                                                                                                                                                                         |                   |
|   | 28 | 4.5-9.9 | $\text{N}_2 \rightarrow \text{X}(\text{H}) \rightarrow \text{N}_2$                                                                                                                                                                                                                                                                                         |                   |
|   | 21 | 4.3-9.9 | $\text{N}_2 \rightarrow \text{N}_2 \rightarrow \text{X}(\text{H})$                                                                                                                                                                                                                                                                                         |                   |
|   | 11 | 5.2-9.6 | $\text{O} \rightarrow \text{X}(\text{H}_2) \rightarrow \text{O} \rightarrow \text{X}(\text{H})$                                                                                                                                                                                                                                                            |                   |
|   | 10 | 5.1-8.7 | $\text{O} \rightarrow \text{X}(\text{H}_2) \rightarrow \text{O} \rightarrow \text{X}(\text{H}_2)$                                                                                                                                                                                                                                                          |                   |
|   | 10 | 2.8-9.3 | $\text{O} \rightarrow \text{X}(\text{H}) \rightarrow \text{O} \rightarrow \text{X}(\text{H}_2)$                                                                                                                                                                                                                                                            |                   |
|   | 9  | 5.7-9.7 | $\text{N} \rightarrow \text{X}(\text{HN}) \rightarrow \text{N} \rightarrow \text{X}(\text{N})$                                                                                                                                                                                                                                                             |                   |
|   | 9  | 4.4-8.2 | $\text{HO} \rightarrow \text{HO} \rightarrow \text{X}(\text{H})$                                                                                                                                                                                                                                                                                           |                   |
|   | 8  | 7.7-9.8 | $\text{H} \rightarrow \text{X}(\text{N}_2) \rightarrow \text{H} \rightarrow \text{X}(\text{HO})$                                                                                                                                                                                                                                                           |                   |
|   | 8  | 5.2-9.9 | $\text{HO} \rightarrow \text{X}(\text{H}) \rightarrow \text{HO}$                                                                                                                                                                                                                                                                                           |                   |
|   | 8  | 3.8-9.7 | $\text{N}_2 \rightarrow \text{N}_2 \rightarrow \text{X}(\text{HO})$                                                                                                                                                                                                                                                                                        |                   |
|   | 7  | 5.7-9   | $\text{H} \rightarrow \text{X}(\text{HO}) \rightarrow \text{H} \rightarrow \text{X}(\text{HO})$                                                                                                                                                                                                                                                            |                   |
|   | 6  | 7.8-9.9 | $\text{H} \rightarrow \text{X}(\text{HO}) \rightarrow \text{H} \rightarrow \text{X}(\text{N}_2)$                                                                                                                                                                                                                                                           |                   |
|   | 6  | 5.8-7.4 | $\text{N}_2 \rightarrow \text{X}(\text{H}_2) \rightarrow \text{N}_2 \rightarrow \text{X}(\text{H})$                                                                                                                                                                                                                                                        |                   |

Table S2. Elementary reactions of CL-20 decomposition at different impact velocities.

| Impact velocities | Frequencies | Reaction time/ps | Elementary reactions | Illustration |
|-------------------|-------------|------------------|----------------------|--------------|
|-------------------|-------------|------------------|----------------------|--------------|

| /km/s |    |         |                                                                                                                                                                                                                                                                                                                                                                                                                                                                                                                                                                                                                                                                                                                                                                                                                                                     |                   |
|-------|----|---------|-----------------------------------------------------------------------------------------------------------------------------------------------------------------------------------------------------------------------------------------------------------------------------------------------------------------------------------------------------------------------------------------------------------------------------------------------------------------------------------------------------------------------------------------------------------------------------------------------------------------------------------------------------------------------------------------------------------------------------------------------------------------------------------------------------------------------------------------------------|-------------------|
| 2     | 9  | 0.3-4.1 | $\text{C}_6\text{H}_6\text{N}_{12}\text{O}_{12} \rightarrow \text{C}_6\text{H}_6\text{N}_{12}\text{O}_{12}\text{-X}(\text{C}_6\text{H}_6\text{N}_{12}\text{O}_{12})$                                                                                                                                                                                                                                                                                                                                                                                                                                                                                                                                                                                                                                                                                | First occur       |
|       | 2  | 0.5-0.7 | $\text{C}_6\text{H}_6\text{N}_{12}\text{O}_{12} + \text{C}_6\text{H}_6\text{N}_{12}\text{O}_{12} \rightarrow \text{C}_{12}\text{H}_{12}\text{N}_{24}\text{O}_{24}$                                                                                                                                                                                                                                                                                                                                                                                                                                                                                                                                                                                                                                                                                  |                   |
|       | 1  | 0.5-0.5 | $\text{C}_6\text{H}_6\text{N}_{12}\text{O}_{12} + \text{C}_6\text{H}_6\text{N}_{12}\text{O}_{12}\text{-X}(\text{C}_6\text{H}_6\text{N}_{12}\text{O}_{12}) \rightarrow \text{C}_{12}\text{H}_{12}\text{N}_{24}\text{O}_{24}\text{-X}(\text{C}_6\text{H}_6\text{N}_{12}\text{O}_{12})$                                                                                                                                                                                                                                                                                                                                                                                                                                                                                                                                                                |                   |
|       | 1  | 0.6-0.6 | $\text{C}_6\text{H}_6\text{N}_{12}\text{O}_{12}\text{-X}(\text{C}_6\text{H}_6\text{N}_{12}\text{O}_{12}) \rightarrow \text{C}_6\text{H}_6\text{N}_{12}\text{O}_{12}\text{-X}(\text{C}_{12}\text{H}_{12}\text{N}_{24}\text{O}_{24})$                                                                                                                                                                                                                                                                                                                                                                                                                                                                                                                                                                                                                 |                   |
|       | 1  | 0.6-0.6 | $\text{C}_{12}\text{H}_{12}\text{N}_{24}\text{O}_{24} \rightarrow \text{C}_6\text{H}_6\text{N}_{12}\text{O}_{12} + \text{C}_6\text{H}_6\text{N}_{12}\text{O}_{12}$                                                                                                                                                                                                                                                                                                                                                                                                                                                                                                                                                                                                                                                                                  |                   |
|       | 5  | 0.7-8.2 | $\text{C}_6\text{H}_6\text{N}_{12}\text{O}_{12} \rightarrow \text{NO}_2 + \text{C}_6\text{H}_6\text{N}_{11}\text{O}_{10}$                                                                                                                                                                                                                                                                                                                                                                                                                                                                                                                                                                                                                                                                                                                           |                   |
|       | 13 | 2.7-9.5 | $\text{C}_6\text{H}_6\text{N}_{11}\text{O}_{10} \rightarrow \text{C}_6\text{H}_6\text{N}_{11}\text{O}_{10}\text{-X}(\text{C}_6\text{H}_6\text{N}_{12}\text{O}_{12})$                                                                                                                                                                                                                                                                                                                                                                                                                                                                                                                                                                                                                                                                                | Highest frequency |
|       | 12 | 3.4-9.1 | $\text{C}_6\text{H}_6\text{N}_{11}\text{O}_{10}\text{-X}(\text{C}_6\text{H}_6\text{N}_{12}\text{O}_{12}) \rightarrow \text{C}_6\text{H}_6\text{N}_{11}\text{O}_{10}$                                                                                                                                                                                                                                                                                                                                                                                                                                                                                                                                                                                                                                                                                |                   |
|       | 9  | 0.3-4.1 | $\text{C}_6\text{H}_6\text{N}_{12}\text{O}_{12} \rightarrow \text{C}_6\text{H}_6\text{N}_{12}\text{O}_{12}\text{-X}(\text{C}_6\text{H}_6\text{N}_{12}\text{O}_{12})$                                                                                                                                                                                                                                                                                                                                                                                                                                                                                                                                                                                                                                                                                |                   |
|       | 6  | 0.8-4.2 | $\text{C}_6\text{H}_6\text{N}_{12}\text{O}_{12}\text{-X}(\text{C}_6\text{H}_6\text{N}_{12}\text{O}_{12}) \rightarrow \text{C}_6\text{H}_6\text{N}_{12}\text{O}_{12}$                                                                                                                                                                                                                                                                                                                                                                                                                                                                                                                                                                                                                                                                                |                   |
|       | 5  | 0.7-8.2 | $\text{C}_6\text{H}_6\text{N}_{12}\text{O}_{12} \rightarrow \text{NO}_2 + \text{C}_6\text{H}_6\text{N}_{11}\text{O}_{10}$                                                                                                                                                                                                                                                                                                                                                                                                                                                                                                                                                                                                                                                                                                                           |                   |
|       | 3  | 5.1-6.4 | $\text{C}_6\text{H}_6\text{N}_{12}\text{O}_{12} \rightarrow \text{C}_6\text{H}_6\text{N}_{12}\text{O}_{12}\text{-X}(\text{C}_{24}\text{H}_{24}\text{N}_{47}\text{O}_{45})$                                                                                                                                                                                                                                                                                                                                                                                                                                                                                                                                                                                                                                                                          |                   |
|       | 3  | 5.0-6.3 | $\text{C}_6\text{H}_6\text{N}_{12}\text{O}_{12}\text{-X}(\text{C}_{24}\text{H}_{24}\text{N}_{47}\text{O}_{45}) \rightarrow \text{C}_6\text{H}_6\text{N}_{12}\text{O}_{12}$                                                                                                                                                                                                                                                                                                                                                                                                                                                                                                                                                                                                                                                                          |                   |
|       | 3  | 2.2-2.9 | $\text{C}_6\text{H}_6\text{N}_{12}\text{O}_{12} \rightarrow \text{C}_6\text{H}_6\text{N}_{12}\text{O}_{12}\text{-X}(\text{C}_{42}\text{H}_{42}\text{N}_{83}\text{O}_{82})$                                                                                                                                                                                                                                                                                                                                                                                                                                                                                                                                                                                                                                                                          |                   |
| 3     | 6  | 0.3-0.5 | $\text{C}_6\text{H}_6\text{N}_{12}\text{O}_{12} \rightarrow \text{C}_6\text{H}_6\text{N}_{12}\text{O}_{12}\text{-X}(\text{C}_6\text{H}_6\text{N}_{12}\text{O}_{12})$                                                                                                                                                                                                                                                                                                                                                                                                                                                                                                                                                                                                                                                                                | First occur       |
|       | 4  | 0.4-0.7 | $\text{C}_6\text{H}_6\text{N}_{12}\text{O}_{12}\text{-X}(\text{C}_6\text{H}_6\text{N}_{12}\text{O}_{12}) \rightarrow \text{C}_6\text{H}_6\text{N}_{12}\text{O}_{12}$                                                                                                                                                                                                                                                                                                                                                                                                                                                                                                                                                                                                                                                                                |                   |
|       | 1  | 0.4-0.4 | $\text{C}_6\text{H}_6\text{N}_{12}\text{O}_{12} + \text{C}_6\text{H}_6\text{N}_{12}\text{O}_{12} \rightarrow \text{C}_{12}\text{H}_{12}\text{N}_{24}\text{O}_{24}$                                                                                                                                                                                                                                                                                                                                                                                                                                                                                                                                                                                                                                                                                  |                   |
|       | 1  | 0.5-0.5 | $\text{C}_6\text{H}_6\text{N}_{12}\text{O}_{12} + \text{C}_6\text{H}_6\text{N}_{12}\text{O}_{12}\text{-X}(\text{C}_6\text{H}_6\text{N}_{12}\text{O}_{12}) \rightarrow \text{C}_{12}\text{H}_{12}\text{N}_{24}\text{O}_{24}\text{-X}(\text{C}_6\text{H}_6\text{N}_{12}\text{O}_{12})$                                                                                                                                                                                                                                                                                                                                                                                                                                                                                                                                                                |                   |
|       | 1  | 0.5-0.5 | $\text{C}_6\text{H}_6\text{N}_{12}\text{O}_{12} \rightarrow \text{C}_6\text{H}_6\text{N}_{12}\text{O}_{12}\text{-X}(\text{C}_6\text{H}_6\text{N}_{12}\text{O}_{12})$                                                                                                                                                                                                                                                                                                                                                                                                                                                                                                                                                                                                                                                                                |                   |
|       | 1  | 0.5-0.5 | $\text{C}_{12}\text{H}_{12}\text{N}_{24}\text{O}_{24} \rightarrow \text{NO}_2 + \text{C}_{12}\text{H}_{12}\text{N}_{23}\text{O}_{22}\text{-X}(\text{C}_6\text{H}_6\text{N}_{12}\text{O}_{12})$                                                                                                                                                                                                                                                                                                                                                                                                                                                                                                                                                                                                                                                      |                   |
|       | 6  | 0.3-0.5 | $\text{C}_6\text{H}_6\text{N}_{12}\text{O}_{12} \rightarrow \text{C}_6\text{H}_6\text{N}_{12}\text{O}_{12}\text{-X}(\text{C}_6\text{H}_6\text{N}_{12}\text{O}_{12})$                                                                                                                                                                                                                                                                                                                                                                                                                                                                                                                                                                                                                                                                                | Highest frequency |
|       | 4  | 7.5-9.7 | $\text{O}_2 + \text{N}_2 \rightarrow \text{N}_2\text{O}_2$                                                                                                                                                                                                                                                                                                                                                                                                                                                                                                                                                                                                                                                                                                                                                                                          |                   |
|       | 4  | 0.4-0.7 | $\text{C}_6\text{H}_6\text{N}_{12}\text{O}_{12}\text{-X}(\text{C}_6\text{H}_6\text{N}_{12}\text{O}_{12}) \rightarrow \text{C}_6\text{H}_6\text{N}_{12}\text{O}_{12}$                                                                                                                                                                                                                                                                                                                                                                                                                                                                                                                                                                                                                                                                                |                   |
|       | 3  | 7.6-8.1 | $\text{N}_2\text{O}_2 \rightarrow \text{O}_2 + \text{N}_2$                                                                                                                                                                                                                                                                                                                                                                                                                                                                                                                                                                                                                                                                                                                                                                                          |                   |
|       | 2  | 8.0-9.3 | $\text{NO-X}(\text{HO}_2) \rightarrow \text{NO-X}(\text{O}_2)$                                                                                                                                                                                                                                                                                                                                                                                                                                                                                                                                                                                                                                                                                                                                                                                      |                   |
|       | 2  | 6.9-9.9 | $\text{N}_2 \rightarrow \text{N}_2\text{-X}(\text{HO})$                                                                                                                                                                                                                                                                                                                                                                                                                                                                                                                                                                                                                                                                                                                                                                                             |                   |
|       | 2  | 6.3-8.2 | $\text{NO} \rightarrow \text{NO-X}(\text{H})$                                                                                                                                                                                                                                                                                                                                                                                                                                                                                                                                                                                                                                                                                                                                                                                                       |                   |
|       | 2  | 6.3-7.2 | $\text{NO}_4\text{-X}(\text{HN}_2\text{O}_3) \rightarrow \text{NO}_4\text{-X}(\text{NO})$                                                                                                                                                                                                                                                                                                                                                                                                                                                                                                                                                                                                                                                                                                                                                           |                   |
|       | 2  | 6.3-6.7 | $\text{NO}_2\text{-X}(\text{NO}_3) \rightarrow \text{NO}_2$                                                                                                                                                                                                                                                                                                                                                                                                                                                                                                                                                                                                                                                                                                                                                                                         |                   |
|       | 2  | 5.9-8.7 | $\text{NO-X}(\text{O}) \rightarrow \text{NO-X}(\text{HNO}_4)$                                                                                                                                                                                                                                                                                                                                                                                                                                                                                                                                                                                                                                                                                                                                                                                       |                   |
|       | 2  | 5.0-9.7 | $\text{NO}_2 \rightarrow \text{NO}_2\text{-X}(\text{H})$                                                                                                                                                                                                                                                                                                                                                                                                                                                                                                                                                                                                                                                                                                                                                                                            |                   |
|       | 2  | 4.2-4.6 | $\text{NO}_2 + \text{NO}_3\text{-X}(\text{H}) \rightarrow \text{N}_2\text{O}_5\text{-X}(\text{H})$                                                                                                                                                                                                                                                                                                                                                                                                                                                                                                                                                                                                                                                                                                                                                  |                   |
|       | 2  | 3.7-5.0 | $\text{O-X}(\text{N}_2\text{O}_4) \rightarrow \text{O-X}(\text{NO}_2)$                                                                                                                                                                                                                                                                                                                                                                                                                                                                                                                                                                                                                                                                                                                                                                              |                   |
|       | 2  | 2.5-2.8 | $\text{NO}_2 \rightarrow \text{NO}_2\text{-X}(\text{N}_2\text{O}_5)$                                                                                                                                                                                                                                                                                                                                                                                                                                                                                                                                                                                                                                                                                                                                                                                |                   |
|       | 2  | 1.8-3.4 | $\text{NO}_2 \rightarrow \text{NO}_2\text{-X}(\text{NO}_3)$                                                                                                                                                                                                                                                                                                                                                                                                                                                                                                                                                                                                                                                                                                                                                                                         |                   |
| 4     | 1  | 0.2-0.2 | $\text{C}_6\text{H}_6\text{N}_{12}\text{O}_{12} \rightarrow \text{C}_6\text{H}_6\text{N}_{12}\text{O}_{12}\text{-X}(\text{C}_{18}\text{H}_{18}\text{N}_{32}\text{O}_{28})$                                                                                                                                                                                                                                                                                                                                                                                                                                                                                                                                                                                                                                                                          | First occur       |
|       | 1  | 0.2-0.2 | $\text{C}_6\text{H}_6\text{N}_{12}\text{O}_{12} + \text{C}_6\text{H}_6\text{N}_{12}\text{O}_{12} + \text{C}_{12}\text{H}_{12}\text{N}_{24}\text{O}_{24}\text{-X}(\text{C}_{198}\text{H}_{198}\text{N}_{380}\text{O}_{353})$                                                                                                                                                                                                                                                                                                                                                                                                                                                                                                                                                                                                                         |                   |
|       | 1  | 0.3-0.3 | $\text{C}_6\text{H}_6\text{N}_{12}\text{O}_{12} \rightarrow \text{C}_6\text{H}_6\text{N}_{12}\text{O}_{12}\text{-X}(\text{O})$                                                                                                                                                                                                                                                                                                                                                                                                                                                                                                                                                                                                                                                                                                                      |                   |
|       | 1  | 0.3-0.3 | $\text{C}_{12}\text{H}_{12}\text{N}_{24}\text{O}_{24}\text{-X}(\text{C}_{198}\text{H}_{198}\text{N}_{380}\text{O}_{353}) + \text{C}_6\text{H}_6\text{N}_{12}\text{O}_{12} + \text{C}_6\text{H}_6\text{N}_{12}\text{O}_{12} + \text{C}_6\text{H}_6\text{N}_{12}\text{O}_{12} + \text{C}_6\text{H}_6\text{N}_{12}\text{O}_{12} + \text{C}_6\text{H}_6\text{N}_{12}\text{O}_{12}\text{-X}(\text{C}_{18}\text{H}_{18}\text{N}_{32}\text{O}_{28}) \rightarrow \text{NO}_2 + \text{NO}_2 + \text{C}_{12}\text{H}_{12}\text{N}_{23}\text{O}_{23}\text{-X}(\text{C}_6\text{H}_6\text{N}_{12}\text{O}_{12}) + \text{C}_{12}\text{H}_{12}\text{N}_{24}\text{O}_{23}\text{-X}(\text{C}_{12}\text{H}_{12}\text{N}_{24}\text{O}_{22}) + \text{C}_{30}\text{H}_{30}\text{N}_{59}\text{O}_{58}\text{-X}(\text{C}_{242}\text{H}_{240}\text{N}_{453}\text{O}_{441})$ |                   |
|       | 1  | 0.4-0.4 | $\text{C}_{12}\text{H}_{12}\text{N}_{23}\text{O}_{23}\text{-X}(\text{C}_6\text{H}_6\text{N}_{12}\text{O}_{12}) + \text{C}_{12}\text{H}_{12}\text{N}_{24}\text{O}_{23}\text{-X}(\text{C}_{12}\text{H}_{12}\text{N}_{24}\text{O}_{22}) + \text{C}_{30}\text{H}_{30}\text{N}_{59}\text{O}_{58}\text{-X}(\text{C}_{242}\text{H}_{240}\text{N}_{453}\text{O}_{441}) + \text{C}_6\text{H}_6\text{N}_{12}\text{O}_{12} + \text{C}_6\text{H}_6\text{N}_{12}\text{O}_{12} + \text{C}_6\text{H}_6\text{N}_{12}\text{O}_{12}\text{-X}(\text{O}) \rightarrow \text{O-X}(\text{C}_6\text{H}_6\text{N}_{12}\text{O}_{11}) + \text{NO}_2 + \text{NO}_2 + \text{NO}_2 + \text{NO}_2 + \text{C}_6\text{H}_6\text{N}_{10}\text{O}_8 + \text{C}_{66}\text{H}_{66}\text{N}_{128}\text{O}_{123}\text{-X}(\text{C}_{347}\text{H}_{342}\text{N}_{645}\text{O}_{611})$      | Highest frequency |
|       | 1  | 0.5-0.5 | $\text{NO}_2 + \text{C}_6\text{H}_6\text{N}_{10}\text{O}_8 \rightarrow \text{NO}_3\text{-X}(\text{H}) + \text{C}_6\text{H}_6\text{N}_{10}\text{O}_7$                                                                                                                                                                                                                                                                                                                                                                                                                                                                                                                                                                                                                                                                                                |                   |
|       | 40 | 4.2-9.9 | $\text{N}_2 \rightarrow \text{N}_2\text{-X}(\text{H})$                                                                                                                                                                                                                                                                                                                                                                                                                                                                                                                                                                                                                                                                                                                                                                                              |                   |
|       | 26 | 4.1-9.8 | $\text{N}_2\text{-X}(\text{H}) \rightarrow \text{N}_2$                                                                                                                                                                                                                                                                                                                                                                                                                                                                                                                                                                                                                                                                                                                                                                                              |                   |

|    |         |                                                                      |
|----|---------|----------------------------------------------------------------------|
| 22 | 3.0-9.4 | $\text{N}_2\text{-X(HO)} \rightarrow \text{N}_2$                     |
| 16 | 2.8-9.9 | $\text{N}_2 \rightarrow \text{N}_2\text{-X(HO)}$                     |
| 15 | 3.4-9.0 | $\text{O-X(H)} \rightarrow \text{O-X(H}_2\text{)}$                   |
| 10 | 3.8-9.5 | $\text{O-X(H}_2\text{)} \rightarrow \text{O-X(H)}$                   |
| 9  | 3.9-9.9 | $\text{O-X(H}_2\text{)} \rightarrow \text{O-X(H}_2\text{)}$          |
| 8  | 3.9-8.6 | $\text{N}_2\text{-X(H)} \rightarrow \text{N}_2\text{-X(H}_2\text{)}$ |
| 8  | 3.5-9.1 | $\text{H-X(HO)} \rightarrow \text{H-X(HO)}$                          |
| 8  | 1.7-9.5 | $\text{N}_2 \rightarrow \text{N}_2\text{-X(N}_2\text{)}$             |
| 7  | 5.7-9.7 | $\text{N}_2\text{-X(H}_2\text{)} \rightarrow \text{N}_2$             |
| 7  | 4.7-9.9 | $\text{N-X(HN)} \rightarrow \text{N-X(N)}$                           |

**Table S3.** Elementary reactions of TNT decomposition at different impact velocities.

| Impact velocities /km/s | Frequencies | Reaction time/ps | Elementary reactions                                                                                                                                                                                                                                      | Illustration      |
|-------------------------|-------------|------------------|-----------------------------------------------------------------------------------------------------------------------------------------------------------------------------------------------------------------------------------------------------------|-------------------|
| 2                       | 4           | 2.2-6.6          | $\text{C}_7\text{H}_5\text{N}_3\text{O}_6 \rightarrow \text{C}_7\text{H}_5\text{N}_3\text{O}_6\text{-X(C}_7\text{H}_5\text{N}_3\text{O}_6\text{)}$                                                                                                        | First occur       |
|                         | 3           | 4.4-6.3          | $\text{C}_7\text{H}_5\text{N}_3\text{O}_6 + \text{C}_7\text{H}_5\text{N}_3\text{O}_6 \rightarrow \text{C}_{14}\text{H}_{10}\text{N}_6\text{O}_{12}$                                                                                                       |                   |
|                         | 2           | 4.5-4.8          | $\text{C}_7\text{H}_5\text{N}_3\text{O}_6\text{-X(C}_7\text{H}_5\text{N}_3\text{O}_6\text{)} \rightarrow \text{C}_7\text{H}_5\text{N}_3\text{O}_6$                                                                                                        |                   |
|                         | 1           | 5.3-5.3          | $\text{C}_7\text{H}_5\text{N}_3\text{O}_6 \rightarrow \text{C}_7\text{H}_5\text{N}_3\text{O}_6\text{-X(C}_{21}\text{H}_{15}\text{N}_9\text{O}_{18}\text{)}$                                                                                               |                   |
|                         | 4           | 2.2-6.6          | $\text{C}_7\text{H}_5\text{N}_3\text{O}_6 \rightarrow \text{C}_7\text{H}_5\text{N}_3\text{O}_6\text{-X(C}_7\text{H}_5\text{N}_3\text{O}_6\text{)}$                                                                                                        | Highest frequency |
|                         | 3           | 4.4-6.3          | $\text{C}_7\text{H}_5\text{N}_3\text{O}_6 + \text{C}_7\text{H}_5\text{N}_3\text{O}_6 \rightarrow \text{C}_{14}\text{H}_{10}\text{N}_6\text{O}_{12}$                                                                                                       |                   |
|                         | 2           | 4.5-4.8          | $\text{C}_7\text{H}_5\text{N}_3\text{O}_6\text{-X(C}_7\text{H}_5\text{N}_3\text{O}_6\text{)} \rightarrow \text{C}_7\text{H}_5\text{N}_3\text{O}_6$                                                                                                        |                   |
| 3                       | 8           | 0.4-1.2          | $\text{C}_7\text{H}_5\text{N}_3\text{O}_6 \rightarrow \text{C}_7\text{H}_5\text{N}_3\text{O}_6\text{-X(C}_7\text{H}_5\text{N}_3\text{O}_6\text{)}$                                                                                                        | First occur       |
|                         | 3           | 0.5-0.9          | $\text{C}_7\text{H}_5\text{N}_3\text{O}_6\text{-X(C}_7\text{H}_5\text{N}_3\text{O}_6\text{)} \rightarrow \text{C}_7\text{H}_5\text{N}_3\text{O}_6$                                                                                                        |                   |
|                         | 1           | 0.5-0.5          | $\text{C}_7\text{H}_5\text{N}_3\text{O}_6 + \text{C}_7\text{H}_5\text{N}_3\text{O}_6 \rightarrow \text{C}_{14}\text{H}_{10}\text{N}_6\text{O}_{12}$                                                                                                       |                   |
|                         | 1           | 0.6-0.6          | $\text{C}_7\text{H}_5\text{N}_3\text{O}_6 \rightarrow \text{C}_7\text{H}_5\text{N}_3\text{O}_6\text{-X(C}_{14}\text{H}_{10}\text{N}_6\text{O}_{12}\text{)}$                                                                                               |                   |
|                         | 1           | 0.6-0.6          | $\text{C}_{14}\text{H}_{10}\text{N}_6\text{O}_{12} + \text{C}_7\text{H}_5\text{N}_3\text{O}_6 \rightarrow \text{C}_{21}\text{H}_{15}\text{N}_9\text{O}_{18}$                                                                                              |                   |
|                         | 1           | 0.7-0.7          | $\text{C}_{21}\text{H}_{15}\text{N}_9\text{O}_{18} \rightarrow \text{C}_{21}\text{H}_{15}\text{N}_9\text{O}_{18}\text{-X(C}_{14}\text{H}_{10}\text{N}_6\text{O}_{12}\text{)}$                                                                             |                   |
|                         | 1           | 0.9-0.9          | $\text{C}_{21}\text{H}_{15}\text{N}_9\text{O}_{18}\text{-X(O)} + \text{C}_7\text{H}_5\text{N}_3\text{O}_6 \rightarrow \text{C}_{28}\text{H}_{20}\text{N}_{12}\text{O}_{24}\text{X(O)}$                                                                    |                   |
|                         | 8           | 0.4-1.2          | $\text{C}_7\text{H}_5\text{N}_3\text{O}_6 \rightarrow \text{C}_7\text{H}_5\text{N}_3\text{O}_6\text{-X(C}_7\text{H}_5\text{N}_3\text{O}_6\text{)}$                                                                                                        | Highest frequency |
| 4                       | 3           | 0.5-0.9          | $\text{C}_7\text{H}_5\text{N}_3\text{O}_6\text{-X(C}_7\text{H}_5\text{N}_3\text{O}_6\text{)} \rightarrow \text{C}_7\text{H}_5\text{N}_3\text{O}_6$                                                                                                        | Highest frequency |
|                         | 1           | 0.3-0.3          | $\text{C}_7\text{H}_5\text{N}_3\text{O}_6 + \text{C}_7\text{H}_5\text{N}_3\text{O}_6 \rightarrow \text{C}_{14}\text{H}_{10}\text{N}_6\text{O}_{12}$                                                                                                       | First occur       |
|                         | 3           | 0.3-0.4          | $\text{C}_7\text{H}_5\text{N}_3\text{O}_6 \rightarrow \text{C}_7\text{H}_5\text{N}_3\text{O}_6\text{-X(C}_7\text{H}_5\text{N}_3\text{O}_6\text{)}$                                                                                                        |                   |
|                         | 1           | 0.4-0.4          | $\text{C}_{14}\text{H}_{10}\text{N}_6\text{O}_{12} \rightarrow \text{C}_{14}\text{H}_{10}\text{N}_6\text{O}_{12}\text{-X(C}_{347}\text{H}_{238}\text{N}_{144}\text{O}_{293}\text{)}$                                                                      |                   |
|                         | 1           | 0.4-0.4          | $\text{C}_7\text{H}_5\text{N}_3\text{O}_6 + \text{C}_7\text{H}_5\text{N}_3\text{O}_6\text{-X(C}_7\text{H}_5\text{N}_3\text{O}_6\text{)} \rightarrow \text{C}_{14}\text{H}_{10}\text{N}_6\text{O}_{12}\text{-X(C}_7\text{H}_5\text{N}_3\text{O}_6\text{)}$ |                   |
|                         | 1           | 0.4-0.4          | $\text{C}_7\text{H}_5\text{N}_3\text{O}_6 + \text{C}_7\text{H}_5\text{N}_3\text{O}_6 \rightarrow \text{C}_{14}\text{H}_{10}\text{N}_6\text{O}_{12}\text{-X(C}_{14}\text{H}_{10}\text{N}_6\text{O}_{12}\text{)}$                                           |                   |
|                         | 1           | 0.5-0.5          | $\text{C}_{14}\text{H}_{10}\text{N}_6\text{O}_{12}\text{-X(C}_{347}\text{H}_{238}\text{N}_{144}\text{O}_{293}\text{)} \rightarrow \text{C}_{14}\text{H}_{10}\text{N}_6\text{O}_{12}\text{-X(C}_{385}\text{H}_{266}\text{N}_{158}\text{O}_{313}\text{)}$   |                   |
|                         | 5           | 6.7-9.2          | $\text{N-X(N)} \rightarrow \text{N-X(HN)}$                                                                                                                                                                                                                | Highest frequency |
|                         | 5           | 3.4-7.9          | $\text{O-X(H}_2\text{)} \rightarrow \text{O-X(H)}$                                                                                                                                                                                                        |                   |
|                         | 3           | 8.3-9.7          | $\text{O-X(H}_2\text{)} \rightarrow \text{O-X(H}_2\text{)}$                                                                                                                                                                                               |                   |
|                         | 3           | 8.0-9.7          | $\text{N-X(H}_3\text{)} \rightarrow \text{N-X(H}_2\text{)}$                                                                                                                                                                                               |                   |
|                         | 3           | 5.9-8.8          | $\text{N}_2 \rightarrow \text{N}_2\text{-X(H)}$                                                                                                                                                                                                           |                   |
|                         | 3           | 5.8-9.5          | $\text{N-X(HN)} \rightarrow \text{N-X(H}_2\text{N)}$                                                                                                                                                                                                      |                   |
|                         | 3           | 5.8-8.1          | $\text{N-X(H}_4\text{)} \rightarrow \text{N-X(H}_3\text{)}$                                                                                                                                                                                               |                   |
